# Supplementary material for: Increased Risk of Migraine in Patients with Temporomandibular Disorder: A Longitudinal Follow-Up Study Using a National Health Screening Cohort
Source: MDPI journal article supplement (doi:10.3390/diagnostics10090724), 2020-09-20
Supplement: s1 [file s1]

## Supplementary Materials

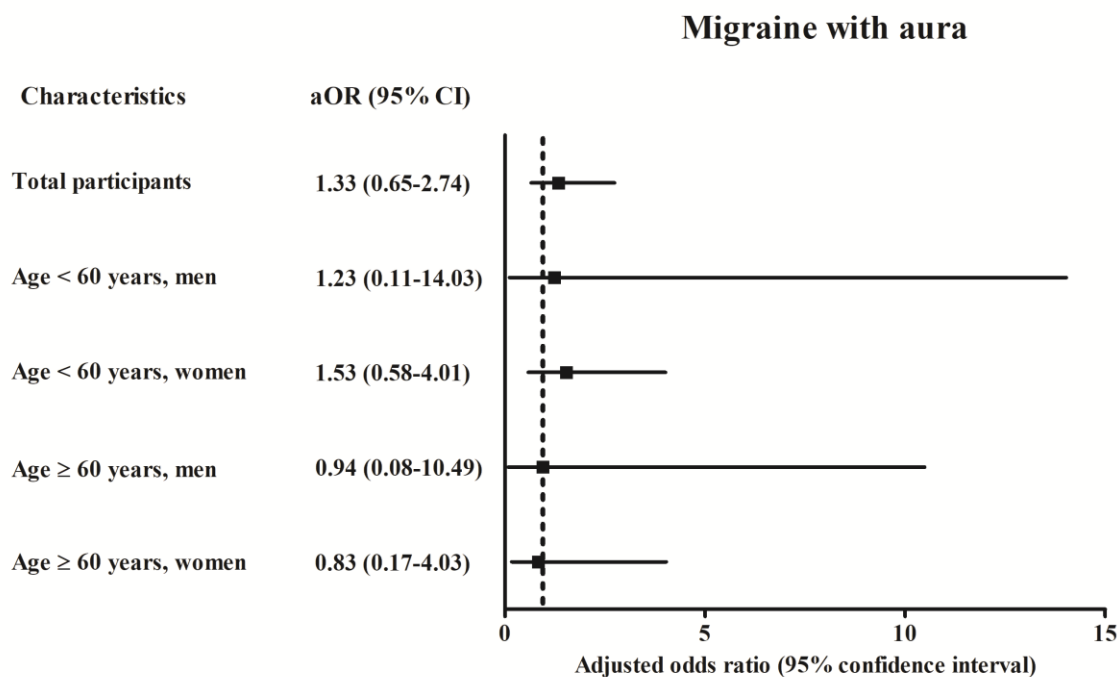

**Figure 1.** Subgroup analyses of crude and adjusted hazard ratios (95% confidence interval) for migraine with aura in temporomandibular disorder and control groups.

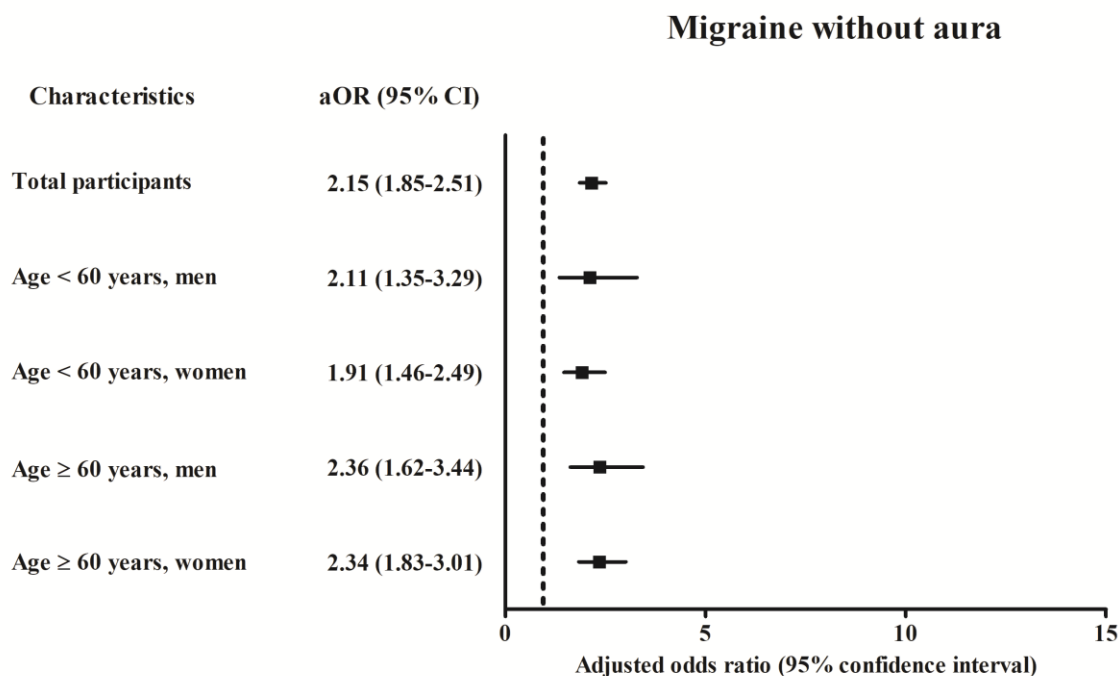

**Figure 2.** Subgroup analyses of crude and adjusted hazard ratios (95% confidence interval) for migraine without aura in temporomandibular disorder and control groups.

**Table 1.** Subgroup analyses of crude and adjusted hazard ratios (95% confidence interval) for migraine with aura in temporomandibular disorder and control groups.

| Characteristics                               | Hazard ratios for migraine with aura |                 |                   |                 |
|-----------------------------------------------|--------------------------------------|-----------------|-------------------|-----------------|
|                                               | Crude†                               | <i>p</i> -value | Adjusted†‡        | <i>p</i> -value |
| Total participants ( <i>n</i> = 19420)        |                                      |                 |                   |                 |
| TMD                                           | 1.29 (0.63-2.63)                     | 0.485           | 1.33 (0.65-2.74)  | 0.434           |
| Control                                       | 1                                    |                 | 1                 |                 |
| Age < 60 years old, men ( <i>n</i> = 4,040)   |                                      |                 |                   |                 |
| TMD                                           | 1.02 (0.11-9.17)                     | 0.983           | 1.23 (0.11-14.03) | 0.868           |
| Control                                       | 1.00                                 |                 | 1.00              |                 |
| Age < 60 years old, women ( <i>n</i> = 4,890) |                                      |                 |                   |                 |
| TMD                                           | 1.61 (0.63-4.16)                     | 0.322           | 1.53 (0.58-4.01)  | 0.389           |
| Control                                       | 1.00                                 |                 | 1.00              |                 |
| Age ≥ 60 years old, men ( <i>n</i> = 4,725)   |                                      |                 |                   |                 |
| TMD                                           | 0.95 (0.11-8.52)                     | 0.964           | 0.94 (0.08-10.49) | 0.959           |
| Control                                       | 1.00                                 |                 | 1.00              |                 |
| Age ≥ 60 years old, women ( <i>n</i> = 5,765) |                                      |                 |                   |                 |
| TMD                                           | 0.99 (0.21-4.67)                     | 0.992           | 0.83 (0.17-4.03)  | 0.817           |
| Control                                       | 1.00                                 |                 | 1.00              |                 |

CCI, Charlson Comorbidity Index; TMD, temporomandibular disorder; \* Stratified Cox proportional hazard regression model, significance at  $p < 0.05$ ; † Models were stratified by age, sex, income, and region of residence. ‡ The model was adjusted for obesity, smoking, alcohol consumption, systolic blood pressure, diastolic blood pressure, fasting blood glucose, total cholesterol, and CCI scores.

**Table 2.** Subgroup analyses of crude and adjusted hazard ratios (95% confidence interval) for migraine without aura in temporomandibular disorder and control groups.

| Characteristics                               | Hazard ratios for migraine without aura |                 |                        |                 |
|-----------------------------------------------|-----------------------------------------|-----------------|------------------------|-----------------|
|                                               | Crude <sup>†</sup>                      | <i>p</i> -value | Adjusted <sup>†‡</sup> | <i>p</i> -value |
| Total participants ( <i>n</i> = 19,420)       |                                         |                 |                        |                 |
| TMD                                           | 2.18 (1.87-2.53)                        | <0.001*         | 2.15 (1.85-2.51)       | <0.001*         |
| Control                                       | 1                                       |                 | 1                      |                 |
| Age < 60 years old, men ( <i>n</i> = 4,040)   |                                         |                 |                        |                 |
| TMD                                           | 2.14 (1.38-3.33)                        | <0.001*         | 2.11 (1.35-3.29)       | 0.001*          |
| Control                                       | 1.00                                    |                 | 1.00                   |                 |
| Age < 60 years old, women ( <i>n</i> = 4,890) |                                         |                 |                        |                 |
| TMD                                           | 1.94 (1.49-2.53)                        | <0.001*         | 1.91 (1.46-2.49)       | <0.001*         |
| Control                                       | 1.00                                    |                 | 1.00                   |                 |
| Age ≥ 60 years old, men ( <i>n</i> = 4,725)   |                                         |                 |                        |                 |
| TMD                                           | 2.30 (1.59-3.34)                        | <0.001*         | 2.36 (1.62-3.44)       | <0.001*         |
| Control                                       | 1.00                                    |                 | 1.00                   |                 |
| Age ≥ 60 years old, women ( <i>n</i> = 5,765) |                                         |                 |                        |                 |
| TMD                                           | 2.36 (1.84-3.02)                        | <0.001*         | 2.34 (1.83-3.01)       | <0.001*         |
| Control                                       | 1.00                                    |                 | 1.00                   |                 |

CCI, Charlson Comorbidity Index; TMD, temporomandibular disorder; \* Stratified Cox proportional hazard regression model, significance at  $P < 0.05$ ; † Models were stratified by age, sex, income, and region of residence. ‡ The model was adjusted for obesity, smoking, alcohol consumption, systolic blood pressure, diastolic blood pressure, fasting blood glucose, total cholesterol, and CCI scores.
